# Supplementary material for: Schlafen family is a prognostic biomarker and corresponds with immune infiltration in gastric cancer
Source: PubMed Central journal article supplement (PMC9452737; doi:10.3389/fimmu.2022.922138), 2022-08-25
Supplement: Table_1.pdf [file Table_1.pdf]

Table S1 The primers used in the methods

| Primers | Forward                 | Reverse                 |
|---------|-------------------------|-------------------------|
| SLFN5   | ACAGACGTGTCACACTGTGTT   | CCCTCAAGCTCGTAAGGTCTAT  |
| SLFN11  | CAGCCTGACAACCGAGAAATG   | GGCCCACTAGATAGACTCAGC   |
| SLFN12  | TTGGAAACGAATTATGCCGAGT  | AGAGCACACATAGCTCGTGAG   |
| SLFN12L | CCCAGAGTTATCCTCTTCGTGA  | CCCTTATTGACAGAGCCCATTTC |
| SLFN13  | CTCTTCAAAACCTCGGGTAGAGT | CCACACAACAGAATGCCTTCA   |
| SLFN14  | CAGCCTTCCACTAAGGATTTGC  | GCTCTAAACCCCTTCTCTCTGAG |
